# Supplementary material for: Hepatoprotective effect of sitagliptin against methotrexate induced liver toxicity
Source: PLoS One. 2017 Mar 23;12(3):e0174295. doi: 10.1371/journal.pone.0174295 (PMC5363865; doi:10.1371/journal.pone.0174295)
Supplement: S1 File — (XLSX) [file pone.0174295.s001.xlsx]

## Sheet: Sheet1
1.1 Data relevant to Table 1 Level of ALT						1.2 Data relvant toTable 1 Level of AST						1.3 Data relvant toTable 1 Level of ALP						1.4 Data relevant to Table 1 Level of LDH						1.5 Data relevant to Table 1 Level of serum glucose
Control	MTX	Sita (10 mg/kg)+ MTX	Sita (20 mg/kg) +MTX	Sita (20 mg/kg)		Control	MTX	Sita (10 mg/kg)+ MTX	Sita (20 mg/kg) +MTX	Sita (20 mg/kg)		Control	MTX	Sita (10 mg/kg)+ MTX	Sita (20 mg/kg) +MTX	Sita (20 mg/kg)		Control	MTX	Sita (10 mg/kg)+ MTX	Sita (20 mg/kg) +MTX	Sita (20 mg/kg)		Control	MTX	Sita (10 mg/kg)+ MTX	Sita (20 mg/kg) +MTX	Sita (20 mg/kg)
26	163	150	78	33		48	266	150	174	66		18	192	184	79	22		94	321	295	173	73		90	130	114	110	110
39	164	130	100	45		66	462	231	95	58		31	158	165	59	25		112	460	348	215	103		100	110	104	103	87
31	157	125	92	38		42	203	218	103	61		29	251	134	74	29		106	302	405	152	89		65	124	137	117	69
18	352	151	88	29		70	467	176	192	48		33	167	178	67	18		51	408	389	186	94		120	98	116	92	73
50	237	134	114	41		75	334	157	187	55		24	143	159	53	20		56	512	291	214	114		89	115	109	102	113
25	112	126	82	49		59	241	266	208	38		39	209	149	48	33		97	524	365	237	127		73	103	91	94	83
53	209	155	97	34		51	250	213	160	41		17	283	180	74	28		82	442	351	228	70		90	127	107	73	99
38	250	172	116	28		64	318	199	224	53		38	152	165	50	28		104	319	323	176	96		104	90	59	89	126
20	270	123	124	22		25	241	254	116	39		32	267	157	63	31		63	443	334	204	85		116	84	92	83	57
26	179	120	85	46		37	394	221	131	44		20	145	142	46	17		72	351	324	160	68		95	110	104	98	92
2.1 Data relevant to Table 2 Level of TAC						2.2 Data relevant to Table 2 Level of MDA						2.3 Data relevant to Table 2 Level of SOD						2.4 Data relevant to Table 2 Level of GSH
Control	MTX	Sita (10 mg/kg)+ MTX	Sita (20 mg/kg) +MTX			Control	MTX	Sita (10 mg/kg)+ MTX	Sita (20 mg/kg) +MTX			Control	MTX	Sita (10 mg/kg)+ MTX	Sita (20 mg/kg) +MTX			Control	MTX	Sita (10 mg/kg)+ MTX	Sita (20 mg/kg) +MTX
0.6	0.5	0.4	0.7			23	41	32	27			12	5	5	11			14	4	6	9
0.8	0.4	0.5	0.5			31	48	42	37			11	6	6	14			7	5	6	7
0.9	0.3	0.6	0.7			26	54	52	22			20	6	6	13			7	6	7	7
0.8	0.4	0.6	0.5			18	68	34	35			22	5	5	13			16	6	9	10
0.9	0.4	0.6	0.7			36	73	39	23			15	6	9	14			12	6	7	8
0.7	0.5	0.5	0.6			25	35	69	51			16	7	4	8			17	5	9	9
0.6	0.3	0.5	0.8			20	43	41	33			22	6	11	14			10	5	8	9
0.9	0.4	0.7	0.6			21	38	63	37			13	6	4	16			10	5	8	9
0.8	0.5	0.4	0.7			24	47	50	27			20	7	9	9			8	6	9	15
0.9	0.6	0.6	0.6			28	44	39	41			12	6	14	15			7	5	8	12
Data relevant to Figure 2 Relative Expression of Nrf2						Data relevant to Figure 2 Relative Nuclear Nrf2-Binding Activity
Control	MTX	Sita (10 mg/kg)+ MTX	Sita (20 mg/kg) +MTX			Control	MTX	Sita (10 mg/kg)+ MTX	Sita (20 mg/kg) +MTX
1	0.33	0.54	0.98			1	0.71	0.92	0.98
1	0.31	0.61	0.53			1	0.5	0.87	0.87
1	0.21	0.49	0.84			1	0.4	0.73	0.95
1	0.36	0.51	0.94			1	0.61	0.45	0.89
1	0.35	0.67	0.59			1	0.4	0.89	0.58
1	0.26	0.59	0.43			1	0.44	0.9	0.69
1	0.22	0.48	0.9			1	0.63	0.64	0.93
1	0.29	0.55	0.81			1	0.51	0.59	0.96
1	0.26	0.59	0.92			1	0.7	0.86	0.82
1	0.24	0.62	0.54			1	0.52	0.81	0.87
Data relevant to Figure 3 Relative Protein/Control Ration of p65						Data relevant to Figure 3 Relative Protein/Control Ration of IKK-α						Data relevant to Figure 3 Relative Protein/Control Ration of IκBα						Data relevant to % NFB immunopositive cells
Control	MTX	Sita (10 mg/kg)+ MTX	Sita (20 mg/kg) +MTX			Control	MTX	Sita (10 mg/kg)+ MTX	Sita (20 mg/kg) +MTX			Control	MTX	Sita (10 mg/kg)+ MTX	Sita (20 mg/kg) +MTX			Control	MTX	Sita (10 mg/kg)+ MTX	Sita (20 mg/kg) +MTX
100	198	52	23			100	258	163	139			100	234	172	121			5	90	47	16
100	161	39	16			100	212	187	109			100	261	159	115			7	93	22	8
100	147	41	25			100	162	192	141			100	289	132	104			4	96	23	18
100	175	54	24			100	259	165	113			100	229	150	104			5	89	39	15
100	194	35	19			100	198	143	101			100	297	202	105			5	78	41	11
100	152	42	24			100	231	166	147			100	325	173	142			4	98	29	8
100	197	54	18			100	174	198	123			100	301	184	112			8	83	30	9
100	163	48	20			100	281	176	118			100	278	129	113			6	86	32	9
100	197	62	32			100	258	157	105			100	327	225	109			4	99	39	11
100	157	43	24			100	272	159	107			100	316	125	101			3	87	49	17
Data relevant to Figure 4 Nitrite/nitrate level						Data relevant to Figure 4 TNF-α level						Data relevant to Figure 4 IL-1β level						Data relevant to Figure 4 IL-6 level
Control	MTX	Sita (10 mg/kg)+ MTX	Sita (20 mg/kg) +MTX			Control	MTX	Sita (10 mg/kg)+ MTX	Sita (20 mg/kg) +MTX			Control	MTX	Sita (10 mg/kg)+ MTX	Sita (20 mg/kg) +MTX			Control	MTX	Sita (10 mg/kg)+ MTX	Sita (20 mg/kg) +MTX
44	83	69	48			92	280	200	112			32	184	112	76			64	232	168	124
37	62	70	43			56	340	144	88			28	176	84	92			32	216	204	104
28	91	59	51			52	228	204	76			28	152	136	56			32	180	192	108
32	67	54	66			52	304	160	72			28	204	124	80			60	248	148	100
39	53	71	55			88	232	208	156			36	272	168	72			36	276	120	116
25	101	73	51			60	212	148	112			40	132	116	72			48	200	140	136
58	55	82	46			52	228	156	140			40	208	124	68			60	176	196	88
49	73	52	50			96	196	140	100			44	192	120	84			60	236	212	104
24	108	55	54			36	316	152	176			48	244	108	80			52	252	232	112
32	65	61	49			52	200	140	152			36	176	120	60			36	192	248	104
Data relevant to Figure 4 Relative Expression of iNOS						Data relevant to Figure 4 Relative Expression of TNF-α						Data relevant to Figure 4 Relative Expression of IL-1β						Data relevant to Figure 4 Relative Expression of IL-6
Control	MTX	Sita (10 mg/kg)+ MTX	Sita (20 mg/kg) +MTX			Control	MTX	Sita (10 mg/kg)+ MTX	Sita (20 mg/kg) +MTX			Control	MTX	Sita (10 mg/kg)+ MTX	Sita (20 mg/kg) +MTX			Control	MTX	Sita (10 mg/kg)+ MTX	Sita (20 mg/kg) +MTX
1	1.4	1.5	1.1			1	2.5	2.1	1.6			1	3.1	2.4	1.4			1	2.4	2.2	1
1	1.7	1.6	1.2			1	2.7	2	1.3			1	3	2.3	1.7			1	2.8	1.7	1.2
1	1.7	1.5	1			1	2.6	1.9	1.4			1	2.8	2	1.2			1	2.9	1.9	1.3
1	1.6	1.4	1			1	2.7	2.1	1.5			1	2.9	1.6	1.5			1	2.5	1.6	1.1
1	1.8	1.4	1			1	2.5	1.8	1.5			1	2.9	1.9	1.7			1	2.7	1.8	1
1	2	1.4	1.2			1	2.8	1.81	1.3			1	2.9	2.9	1.8			1	2.7	1.8	1
1	1.9	1.5	1.1			1	2.6	2	1.4			1	2.9	2.3	1.7			1	2.4	1.9	1.2
1	1.8	1.5	1.1			1	2.4	1.9	1.4			1	2.6	2.3	1.9			1	2.6	1.8	1.05
1	1.8	1.3	1.2			1	2.6	2.2	1.4			1	2.7	1.8	1.4			1	2.4	1.6	1.3
1	1.8	1.3	1.1			1	2.8	2.3	1.5			1	2.7	1.7	1.5			1	2.6	1.7	1.1
Data relevant to Apoptotic Index (AI)						Data relevant to % Bax immunopositive cells						Data relevant to Bax level						Data relevant to Bcl2 level
Control	MTX	Sita (10 mg/kg)+ MTX	Sita (20 mg/kg) +MTX			Control	MTX	Sita (10 mg/kg)+ MTX	Sita (20 mg/kg) +MTX			Control	MTX	Sita (10 mg/kg)+ MTX	Sita (20 mg/kg) +MTX			Control	MTX	Sita (10 mg/kg)+ MTX	Sita (20 mg/kg) +MTX
2	25	10	3			6	91	50	16			4	16	8	9			16	5	9	13
5	33	4	5			5	88	62	12			3	18	8	10			19	7	14	17
2	38	5	5			8	96	33	14			5	21	9	9			17	8	10	15
3	40	15	6			6	59	37	17			3	14	14	11			15	4	14	15
2	26	4	3			7	96	32	10			3	14	15	6			16	7	7	8
4	38	8	4			10	98	49	14			6	16	16	7			11	5	9	10
4	16	13	6			6	74	30	22			7	12	15	8			11	5	10	7
2	26	7	6			9	95	61	13			7	15	11	7			14	8	15	14
2	30	6	2			7	98	37	23			5	17	8	9			12	7	6	12
6	18	9	4			6	91	49	11			6	20	9	9			14	6	8	13
Data relevant to Caspase 3 level
Control	MTX	Sita (10 mg/kg)+ MTX	Sita (20 mg/kg) +MTX
5	15	12	9
4	14	11	10
5	10	13	7
3	16	11	8
4	17	9	9
6	12	7	10
5	13	11	9
4	16	10	8
4	9	11	8
5	11	8	7
